# Supplementary material for: Somatic mutation profiling, tumor-infiltrating leukocytes, tertiary lymphoid structures and PD-L1 protein expression in HER2-amplified colorectal cancer
Source: PeerJ. 2023 May 2;11:e15261. doi: 10.7717/peerj.15261 (PMC10162038; doi:10.7717/peerj.15261)
Supplement: Supplemental Information 1 [file peerj-11-15261-s001.xls]

## Sheet: Clinicopathological data
serial number	IHC-HER2	FISH-HER2	PFS（month）	serial number（0=NO；1=YES）	OS（month）	Survival（0=YES；1=NO）	Gender（0=man，1= female）	age(＜63=0;≥63=1）	MMR（0=pMMR；1=dMMR）	CEA（≤5=0;＞5=1）	Tumor site（0=right，1=left；）	T	N	M	TNM
1	0	0	16	1	72	1	0	0	1	1	1	3	2	0	3
2	0	0	3	1	28	1	0	0	0	1	1	2	1	1	4
3	0	0	20	1	22	1	0	0	0	0	1	3	0	0	2
4	0	0	6	1	22	1	0	0	0	0	1	3	2	0	3
5	0	0	86	1	90	1	0	0	0	0	1	3	1	0	3
6	0	0	9	1	65	1	1	0	0	0	1	2	0	1	4
7	0	0	1	1	13	1	0	0	0	1	0	4	2	1	4
8	0	0	12	1	28	1	0	1	0	1	0	3	2	0	3
9	0	0	5	1	18	1	0	0	1	0	1	4	2	1	4
10	0	0	3	1	26	1	0	1	0	1	1	3	1	1	4
11	0	0	5	1	14	1	0	0	0	1	1	4	0	0	2
12	0	0	1	1	43	1	0	1	0	0	0	4	1	0	3
13	0	0	12	0	12	1	1	1	1	0	1	2	1	0	3
14	0	0	2	1	13	1	0	0	0	1	1	2	2	0	3
15	0	0	21	1	27	1	1	1	0	0	0	4	1	1	4
16	0	0	12	1	24	1	0	0	0	0	1	4	0	0	2
17	0	0	14	1	24	1	1	1	0	0	1	4	0	0	2
18	0	0	8	1	12	1	0	1	0	1	1	4	0	0	2
19	0	0	37	1	54	1	1	0	0	0	1	4	2	1	4
20	0	0	7	0	7	1	1	0	0	1	1	4	1	0	3
21	0	0	12	1	23	1	1	1	1	0	1	4	0	1	4
22	0	0	68	0	68	1	0	0	1	1	1	3	1	0	3
23	0	0	27	1	48	1	1	0	1	1	1	4	2	0	3
24	0	0	14	0	14	1	0	1	0	1	1	3	1	0	3
25	0	0	18	1	22	1	1	0	0	1	0	3	2	0	3
26	0	0	20	1	27	1	1	1	0	0	1	4	1	0	3
27	0	0	13	1	13	1	0	0	0	1	1	4	2	1	4
28	0	0	27	1	51	1	1	0	0	1	1	4	2	1	4
29	0	0	12	1	14	1	1	0	1	1	1	4	2	0	3
30	0	0	3	1	25	1	0	0	1	1	1	4	1	0	3
31	0	0	23	1	48	1	1	0	0	0	1	3	2	1	4
32	0	0	12	0	22	1	0	1	0	1	0	4	1	0	3
33	0	0	31	1	39	1	0	1	1	1	1	3	2	1	4
34	0	0	5	1	21	1	0	0	0	0	1	4	0	1	4
35	0	0	22	1	44	1	0	0	1	1	1	2	2	1	4
36	0	0	8	0	8	1	1	0	0	0	1	3	1	0	3
37	0	0	8	1	28	1	0	1	0	0	1	3	2	0	3
38	0	0	2	1	9	1	1	1	0	1	1	4	1	1	4
39	0	0	3	1	7	1	0	0	1	1	0	3	2	1	4
40	0	0	38	0	38	1	0	1	0	1	1	3	1	0	3
41	0	0	3	1	12	1	1	1	0	1	1	3	1	0	3
42	0	0	40	0	40	1	1	0	1	1	1	4	1	0	3
43	0	0	1	1	20	1	1	0	0	0	1	3	1	0	3
44	0	0	6	1	29	1	0	1	1	1	1	3	0	1	4
45	0	0	6	1	21	1	0	1	0	0	1	4	2	0	3
46	0	0	6	1	28	1	0	0	0	0	0	3	1	0	3
47	0	0	1	1	8	1	1	1	1	1	1	3	1	1	4
48	0	0	25	1	27	1	0	1	0	1	1	3	1	0	3
49	0	0	41	1	44	1	1	1	0	1	1	4	2	0	3
50	0	0	11	1	14	1	0	1	0	1	1	4	1	0	3
51	0	0	17	1	18	1	0	0	0	1	1	2	1	0	3
52	0	0	21	1	36	1	0	0	1	0	1	2	2	0	3
53	0	0	5	1	18	1	0	0	0	0	1	3	2	1	4
54	0	0	37	1	38	1	1	0	0	1	1	4	2	0	3
55	0	0	4	1	31	1	1	1	1	1	1	3	1	0	3
56	0	0	23	1	34	1	0	0	0	1	1	3	1	0	3
57	0	0	3	1	6	1	0	1	1	1	1	4	1	1	4
58	0	0	7	1	14	1	0	1	0	1	0	4	2	0	3
59	0	0	36	1	47	1	1	0	0	1	1	4	2	1	4
60	0	0	6	1	19	1	1	0	0	1	1	3	2	0	3
61	0	0	1	1	35	1	0	0	0	1	1	4	2	0	3
62	0	0	20	0	20	1	0	0	0	0	1	2	1	0	3
63	0	0	12	1	16	1	0	1	0	1	1	4	2	0	3
64	0	0	2	1	15	1	0	1	0	0	1	3	1	0	3
65	0	0	4	1	11	1	0	1	1	1	1	4	0	1	4
66	0	0	8	1	15	1	0	0	0	1	0	4	2	0	3
67	0	0	17	1	31	1	0	0	1	0	1	3	1	0	3
68	0	0	15	1	16	1	0	1	0	1	0	3	2	0	3
69	0	0	1	1	11	1	1	1	0	0	1	3	2	1	4
70	0	0	11	1	11	1	1	0	1	0	1	4	2	0	3
71	0	0	19	1	29	1	1	0	0	1	1	3	2	0	3
72	0	0	22	0	22	1	0	0	0	0	1	2	1	0	3
73	0	0	8	1	22	1	0	1	0	0	1	4	2	1	4
74	0	0	25	0	25	1	1	1	0	1	1	4	1	0	3
75	0	0	6	1	25	1	1	1	0	1	1	4	2	0	3
76	0	0	38	0	38	1	0	1	0	0	1	3	2	0	3
77	0	0	10	1	11	1	1	0	1	1	1	4	0	1	4
78	0	0	6	1	6	1	1	1	0	0	1	4	1	0	3
79	0	0	1	0	1	1	1	0	1	1	0	3	2	1	4
80	0	0	1	0	1	1	1	1	0	0	1	3	2	1	4
81	0	0	18	1	35	1	0	0	1	1	1	4	1	1	4
82	0	0	1	0	1	1	0	1	1	1	0	3	1	0	3
83	0	0	17	1	39	1	0	0	1	0	1	3	0	1	4
84	0	0	2	1	16	1	0	1	0	1	0	3	2	1	4
85	0	0	2	1	30	1	0	1	0	1	1	4	1	0	3
86	0	0	24	1	55	1	1	1	1	1	1	3	0	1	4
87	0	0	1	1	12	1	0	1	0	0	1	2	1	0	3
88	0	0	4	1	7	1	0	1	0	1	1	3	2	1	4
89	0	0	6	1	14	1	0	1	1	1	1	3	1	0	3
90	0	0	1	1	6	1	0	0	0	1	1	4	0	1	4
91	0	0	1	1	7	1	0	0	0	1	1	4	2	1	4
92	0	0	1	0	1	1	0	0	1	1	0	4	2	0	3
93	0	0	4	0	4	1	0	1	1	0	1	3	1	0	3
94	0	0	6	1	19	1	1	1	0	1	1	4	0	1	4
95	0	0	6	1	17	1	0	1	0	1	1	4	2	0	3
96	0	0	5	1	16	1	1	0	0	1	1	4	1	0	3
97	0	0	23	1	35	1	1	0	0	1	1	3	1	1	4
98	0	0	13	1	33	1	0	0	0	1	1	4	0	1	4
99	0	0	4	1	19	1	1	0	0	1	1	4	1	1	4
100	0	0	29	1	39	1	0	1	0	1	1	4	0	1	4
101	0	0	7	1	16	1	1	1	0	1	0	4	2	1	4
102	0	0	5	1	10	1	0	0	0	1	1	4	1	1	4
103	0	0	14	1	23	1	0	1	0	1	0	4	1	1	4
104	0	0	4	0	4	1	1	1	0	1	0	3	2	0	3
105	0	0	11	1	19	1	0	0	0	1	1	4	0	1	4
106	0	0	9	1	27	1	1	0	0	0	1	3	2	0	3
107	0	0	9	1	14	1	0	0	1	0	1	4	2	0	3
108	0	0	7	1	16	1	0	0	0	1	0	3	2	1	4
109	0	0	3	1	7	1	0	0	0	0	1	4	2	0	3
110	0	0	2	1	7	1	1	1	1	1	0	4	2	1	4
111	0	0	21	1	24	1	1	0	1	0	0	3	1	1	4
112	0	0	4	1	7	1	1	1	0	1	0	4	2	1	4
113	0	0	54	1	70	1	1	1	0	0	1	4	2	0	3
114	0	0	13	1	28	1	1	1	0	1	1	4	1	0	3
115	0	0	1	1	7	1	0	0	0	0	0	3	1	1	4
116	0	0	8	0	8	1	1	1	0	1	1	3	1	0	3
117	0	0	23	1	32	1	1	0	0	0	0	3	0	1	4
118	0	0	4	1	6	1	0	1	0	1	1	3	0	1	4
119	0	0	11	1	17	1	0	0	0	0	1	4	2	1	4
120	0	0	26	1	26	1	1	1	0	0	1	3	2	0	3
121	0	0	9	1	26	1	0	0	0	0	1	3	1	0	3
122	0	0	11	1	25	1	1	1	1	1	0	3	2	1	4
123	0	0	11	1	16	1	0	0	0	1	1	3	2	1	4
124	0	0	5	1	57	1	1	0	1	1	1	4	1	1	4
125	0	0	5	0	5	1	0	1	0	1	0	4	1	1	4
126	0	0	9	1	17	1	0	0	0	1	1	3	1	1	4
127	0	0	2	1	4	1	0	1	0	1	1	4	1	1	4
128	0	0	1	1	5	1	0	1	0	0	0	4	2	1	4
129	0	0	18	1	36	1	1	0	0	1	1	4	2	1	4
130	0	0	1	1	3	1	0	0	0	1	1	4	2	1	4
131	0	0	1	1	42	1	0	1	0	0	1	3	0	1	4
132	0	0	8	1	15	1	0	1	0	1	1	4	1	1	4
133	0	0	9	1	28	1	1	1	0	1	1	3	1	0	3
134	0	0	12	1	29	1	0	1	1	1	0	3	1	0	3
135	0	0	1	1	23	1	1	1	0	0	0	3	1	0	3
136	0	0	6	0	6	1	0	1	1	1	1	2	1	0	3
137	0	0	3	1	8	1	0	1	0	1	0	4	2	1	4
138	0	0	9	1	55	0	1	0	1	1	1	3	2	1	4
139	0	0	29	1	35	0	0	0	0	1	1	3	2	1	4
140	0	0	11	1	48	0	0	1	0	1	1	3	2	1	4
141	0	0	12	1	48	0	0	0	0	1	1	4	1	1	4
142	0	0	26	1	35	0	1	0	0	1	1	4	2	1	4
143	0	0	18	1	39	0	0	1	0	1	1	3	1	1	4
144	0	0	2	1	29	0	0	0	0	1	1	2	2	1	4
145	0	0	36	1	58	0	0	0	0	0	0	4	1	1	4
146	0	0	2	1	30	0	0	1	0	1	1	3	0	1	4
147	0	0	86	1	97	0	0	0	1	1	1	3	0	1	4
148	0	0	50	1	67	0	0	0	0	1	1	3	1	1	4
149	0	0	5	1	94	0	0	0	0	1	1	4	1	1	4
150	0	0	5	1	8	0	1	1	0	1	1	3	0	1	4
151	0	0	5	1	44	0	0	1	0	0	1	4	2	1	4
152	0	0	10	1	39	0	0	0	1	0	1	3	1	1	4
153	0	0	51	1	56	0	0	1	0	1	1	3	2	1	4
154	0	0	28	0	28	0	0	1	0	1	1	3	1	1	4
155	0	0	10	1	28	0	1	0	0	0	1	4	2	1	4
156	0	0	8	1	26	0	1	0	1	1	1	3	1	1	4
157	0	0	9	1	19	0	1	1	1	1	1	4	0	1	4
158	0	0	2	1	3	0	1	1	0	1	1	4	0	1	4
159	0	0	4	1	13	0	0	1	0	1	1	3	0	1	4
160	0	0	3	1	32	0	0	0	0	1	1	2	0	1	4
161	0	0	3	1	32	0	0	0	0	0	1	3	0	1	4
162	0	0	4	1	5	0	1	1	0	1	1	3	1	1	4
163	0	0	3	1	4	0	1	0	0	1	1	4	2	1	4
164	0	0	21	1	21	0	0	1	0	1	1	3	1	1	4
165	0	0	4	1	15	0	0	0	0	0	1	3	0	1	4
166	0	0	1	1	2	0	0	0	0	1	1	3	1	1	4
167	0	0	2	1	5	0	1	1	0	0	1	3	0	1	4
168	0	0	4	1	8	1	1	0	1	1	0	3	0	1	4
169	0	0	1	1	27	0	1	1	0	1	0	4	0	1	4
170	0	0	43	1	52	0	1	1	0	0	1	3	0	1	4
171	0	0	16	1	30	1	0	0	0	1	1	3	2	1	4
172	0	0	4	1	5	0	0	1	0	1	1	3	0	1	4
173	0	0	4	1	37	1	0	1	1	1	1	3	1	1	4
174	0	0	1	1	15	1	1	0	0	0	1	3	1	1	4
175	0	0	4	1	18	1	0	1	0	1	1	2	0	1	4
176	0	0	77	0	77	0	1	1	0	0	1	3	0	1	4
177	0	0	8	1	29	0	0	0	0	1	1	4	2	1	4
178	0	0	2	1	19	1	0	1	0	1	0	4	1	1	4
179	0	0	3	1	46	1	1	0	0	1	1	3	0	1	4
180	0	0	2	0	5	1	0	1	0	0	1	3	1	1	4
181	0	0	1	1	16	1	1	0	0	1	0	3	1	1	4
182	0	0	5	1	16	1	0	0	0	1	1	3	2	1	4
183	0	0	11	1	21	1	0	1	1	1	1	2	1	1	4
184	0	0	10	1	95	0	0	1	0	0	0	3	1	1	4
185	0	0	5	1	30	0	1	0	0	1	1	3	0	1	4
186	0	0	27	1	42	0	1	0	0	1	1	4	2	1	4
187	0	0	8	1	18	1	0	0	1	1	1	4	0	1	4
188	0	0	35	1	48	1	0	1	1	1	1	3	0	1	4
189	0	0	39	0	39	0	1	1	0	0	1	2	0	0	1
190	0	0	53	0	53	0	0	0	1	0	1	3	0	1	4
191	2	0	34	1	34	1	0	0	0	0	1	4	1	0	3
192	0	0	45	0	45	0	1	0	0	1	1	3	1	0	3
193	0	0	65	0	65	0	0	0	0	0	1	3	2	0	3
194	0	0	70	0	70	0	1	1	1	0	1	2	1	0	3
195	0	0	59	0	59	0	0	1	0	0	0	3	2	0	3
196	0	0	56	0	56	0	1	1	0	1	0	4	1	0	3
197	0	0	83	0	83	0	0	1	0	1	1	3	1	0	3
198	0	0	72	0	72	0	1	1	0	0	1	3	1	0	3
199	0	0	16	0	16	1	0	1	0	0	1	2	1	0	3
200	0	0	55	0	55	0	1	0	1	0	1	4	2	0	3
201	0	0	41	0	41	0	0	0	0	1	1	3	1	0	3
202	0	0	42	0	42	0	1	0	0	1	1	4	2	0	3
203	0	0	72	0	72	0	1	0	0	0	1	3	1	0	3
204	0	0	55	0	55	0	0	0	0	0	1	4	2	0	3
205	0	0	87	0	87	0	0	0	1	0	1	3	2	0	3
206	0	0	23	1	44	1	0	0	0	1	1	4	2	0	3
207	0	0	51	0	51	0	0	0	0	0	1	3	1	0	3
208	0	0	62	0	62	0	1	0	0	0	1	2	2	0	3
209	0	0	48	0	48	0	1	0	0	1	1	3	1	0	3
210	0	0	57	0	57	0	0	1	0	0	1	2	0	0	1
211	0	0	73	0	73	0	0	0	1	0	0	3	2	0	3
212	0	0	47	0	47	0	0	1	0	1	1	2	1	0	3
213	0	0	36	0	36	0	1	1	1	0	1	2	0	0	1
214	0	0	78	0	78	0	1	1	0	0	1	4	1	0	3
215	0	0	64	0	64	0	1	0	1	0	0	2	0	0	1
216	0	0	51	0	51	0	0	1	0	0	0	3	1	0	3
217	0	0	62	0	62	0	0	1	0	0	1	3	1	0	3
218	0	0	66	0	66	0	0	0	0	0	1	2	0	0	1
219	0	0	45	0	45	0	1	0	0	0	1	2	1	0	3
220	0	0	73	0	73	1	0	0	0	1	1	2	0	0	1
221	2	0	97	0	97	0	1	0	1	0	1	4	0	0	2
222	0	0	63	0	63	0	1	0	0	0	1	2	1	0	3
223	0	0	10	1	30	1	1	1	0	0	1	3	1	0	3
224	0	0	38	0	38	0	0	1	0	1	1	4	2	0	3
225	0	0	61	0	61	0	0	1	0	0	1	3	1	0	3
226	0	0	38	0	38	0	0	0	0	1	1	3	1	0	3
227	0	0	45	0	45	0	1	0	0	0	0	3	1	0	3
228	0	0	61	0	61	0	0	0	1	0	0	2	1	0	3
229	0	0	54	0	54	0	1	0	1	0	1	3	2	0	3
230	0	0	13	1	19	1	0	0	0	0	0	3	2	0	3
231	0	0	35	0	35	0	0	0	0	1	1	3	1	0	3
232	0	0	37	0	37	0	0	0	0	0	0	3	1	0	3
233	0	0	10	1	27	1	1	0	0	0	1	4	1	0	3
234	0	0	53	0	53	0	0	1	0	1	0	3	1	0	3
235	0	0	41	0	41	0	1	1	0	1	1	3	2	0	3
236	0	0	40	0	40	0	0	1	0	0	1	3	2	0	3
237	0	0	69	0	69	0	0	1	0	0	1	2	1	0	3
238	0	0	59	0	59	0	0	0	1	0	0	4	1	0	3
239	0	0	25	1	39	1	0	0	0	1	1	4	2	0	3
240	0	0	77	0	77	0	1	0	0	0	1	3	2	0	3
241	0	0	15	1	17	1	0	0	0	1	1	3	1	0	3
242	2	0	61	0	61	0	0	1	0	0	0	3	1	0	3
243	0	0	35	0	35	0	0	0	0	1	0	3	1	0	3
244	0	0	76	0	76	0	1	0	0	1	0	3	1	0	3
245	0	0	40	0	40	0	0	1	1	1	1	3	1	0	3
246	0	0	85	0	85	0	1	1	1	0	0	3	0	0	2
247	0	0	58	0	58	0	0	0	0	0	0	3	1	0	3
248	0	0	59	0	59	0	1	0	0	1	1	4	0	0	2
249	1	0	98	0	98	0	1	0	0	0	0	4	1	0	3
250	0	0	53	0	53	0	0	1	1	1	1	3	1	0	3
251	0	0	37	0	37	0	0	1	0	0	1	2	2	0	3
252	0	0	67	0	67	0	1	0	1	0	1	4	0	0	2
253	0	0	52	0	52	0	1	1	1	0	0	3	0	0	2
254	0	0	47	0	47	0	1	0	0	0	1	3	0	0	2
255	0	0	59	0	59	0	0	1	1	1	1	3	1	0	3
256	0	0	55	0	55	0	1	0	0	0	1	3	0	0	2
257	0	0	70	0	70	0	1	0	0	0	1	3	0	0	2
258	0	0	55	0	55	0	1	0	1	0	1	3	1	0	3
259	0	0	61	0	61	0	1	0	0	0	1	3	0	0	2
260	0	0	39	0	39	0	0	0	0	1	0	3	1	0	3
261	0	0	68	0	68	0	0	0	0	0	0	3	0	0	2
262	0	0	37	0	37	0	0	1	0	0	1	4	0	0	2
263	0	0	12	0	12	1	1	0	1	1	1	4	0	0	2
264	0	0	60	0	60	0	1	1	0	1	1	3	0	0	2
265	0	0	67	0	67	0	1	0	1	0	0	3	1	0	3
266	0	0	49	0	49	0	1	1	0	1	1	3	0	0	2
267	0	0	49	0	49	0	0	1	0	0	0	3	0	0	2
268	0	0	48	0	48	0	0	0	0	1	1	3	0	0	2
269	0	0	56	0	56	0	0	1	0	1	1	3	0	0	2
270	0	0	68	0	68	0	1	1	0	0	1	3	1	0	3
271	0	0	69	0	69	0	0	0	1	0	0	3	2	0	3
272	0	0	52	0	52	0	1	1	0	0	1	3	0	0	2
273	0	0	15	1	26	1	0	1	0	1	1	4	0	0	2
274	0	0	13	1	33	1	0	1	1	1	1	3	2	0	3
275	0	0	49	0	49	0	1	1	0	1	0	4	0	0	2
276	0	0	82	0	82	0	1	1	0	1	0	3	0	0	2
277	0	0	63	0	63	0	1	1	0	1	1	3	2	0	3
278	0	0	58	0	58	0	1	0	0	0	1	3	0	0	2
279	0	0	37	0	37	0	1	0	0	0	1	3	0	0	2
280	0	0	72	0	72	0	0	1	0	0	0	3	0	0	2
281	0	0	73	0	73	0	1	0	1	0	1	3	0	0	2
282	0	0	12	1	42	1	0	0	1	0	1	4	2	0	3
283	0	0	68	0	68	0	0	0	0	1	0	3	2	0	3
284	0	0	40	0	40	0	0	1	0	1	1	3	0	0	2
285	0	0	56	0	56	0	0	0	0	1	1	3	0	0	2
286	0	0	58	0	58	0	0	1	1	0	0	4	1	0	3
287	0	0	37	0	37	0	0	0	0	0	1	3	0	0	2
288	0	0	83	0	83	0	1	0	0	1	1	3	1	0	3
289	0	0	60	0	60	0	0	0	0	0	1	3	0	0	2
290	0	0	46	0	46	1	1	1	0	0	0	4	0	0	2
291	2	0	32	0	32	1	0	1	0	1	1	3	0	0	2
292	0	0	36	0	36	0	1	0	0	0	1	3	0	0	2
293	0	0	82	0	82	0	0	1	0	0	1	2	1	0	3
294	0	0	47	0	47	0	0	1	0	1	0	3	0	0	2
295	0	0	16	0	16	1	0	0	1	0	0	3	0	0	2
296	0	0	44	0	44	0	0	0	0	0	1	3	1	0	3
297	0	0	85	0	85	0	1	0	0	0	1	3	1	0	3
298	0	0	67	0	67	0	0	1	0	0	0	4	1	0	3
299	0	0	40	0	40	0	1	0	0	0	1	3	0	0	2
300	0	0	36	0	36	0	0	1	0	0	1	4	1	0	3
301	0	0	41	0	41	0	0	1	0	0	1	2	2	0	3
302	0	0	57	0	57	0	1	1	0	0	1	4	1	0	3
303	0	0	40	0	40	0	0	0	0	1	1	3	0	0	2
304	0	0	45	0	45	0	0	1	0	0	1	3	2	0	3
305	0	0	37	0	37	0	0	0	1	0	1	3	0	0	2
306	0	0	78	0	78	0	0	0	1	0	1	3	0	0	2
307	0	0	53	0	53	0	1	1	0	1	1	3	0	0	2
308	0	0	41	0	41	0	0	0	0	0	1	3	0	0	2
309	0	0	65	0	65	0	1	1	0	1	1	4	0	0	2
310	0	0	58	0	58	0	1	1	0	1	1	4	0	0	2
311	0	0	36	0	36	0	0	0	1	0	0	4	0	0	2
312	0	0	63	0	63	0	0	0	0	1	0	3	0	0	2
313	0	0	71	0	71	0	1	1	0	1	1	3	1	0	3
314	0	0	51	0	51	0	0	1	0	1	1	3	0	0	2
315	0	0	70	0	70	0	0	0	0	0	1	3	2	0	3
316	0	0	52	0	52	0	1	0	0	0	1	4	2	0	3
317	0	0	70	0	70	0	0	1	0	0	1	3	0	0	2
318	0	0	57	0	57	0	0	0	1	0	1	3	0	0	2
319	0	0	48	0	48	0	1	0	0	0	1	3	2	0	3
320	0	0	71	0	71	0	1	0	0	0	1	3	0	0	2
321	0	0	37	0	37	0	0	1	0	1	1	3	0	0	2
322	0	0	49	0	49	0	1	1	1	0	0	4	0	0	2
323	0	0	50	0	50	0	0	0	0	0	1	4	0	0	2
324	0	0	45	0	45	0	1	0	1	0	1	4	0	0	2
325	0	0	66	0	66	0	0	0	0	0	0	3	1	0	3
326	0	0	34	0	34	0	0	1	0	1	1	4	0	0	2
327	0	0	75	0	75	0	0	1	0	0	0	3	1	0	3
328	0	0	74	0	74	0	0	1	0	0	0	3	0	0	2
329	0	0	60	0	60	0	0	1	0	1	1	3	0	0	2
330	0	0	70	0	70	0	1	0	0	0	0	3	0	0	2
331	0	0	11	1	11	1	1	0	0	0	1	4	0	0	2
332	0	0	45	0	45	0	1	1	0	1	1	4	2	0	3
333	0	0	40	0	40	0	0	0	0	0	1	3	0	0	2
334	0	0	49	0	49	0	1	0	1	0	1	3	0	0	2
335	0	0	40	1	52	1	0	0	0	0	1	2	1	0	3
336	0	0	21	0	21	1	0	0	1	0	1	3	0	0	2
337	0	0	48	0	48	0	1	1	0	1	1	3	0	0	2
338	0	0	41	0	41	0	0	0	0	1	1	3	0	0	2
339	0	0	37	0	37	0	0	1	0	1	1	3	1	0	3
340	0	0	46	0	46	0	1	0	0	0	1	2	1	0	3
341	0	0	37	0	37	0	0	1	0	1	1	3	0	0	2
342	0	0	47	0	47	0	1	1	1	0	1	4	1	0	3
343	0	0	24	0	24	1	0	1	0	1	1	4	2	0	3
344	0	0	82	0	82	0	1	0	0	0	1	3	0	0	2
345	0	0	45	0	45	0	0	0	1	0	1	3	0	0	2
346	0	0	62	0	62	0	0	0	0	0	0	3	0	0	2
347	0	0	40	0	40	0	1	0	0	0	0	3	0	0	2
348	0	0	41	0	41	0	1	1	0	1	1	2	0	0	1
349	0	0	48	0	48	0	1	0	1	0	0	2	0	0	1
350	0	0	29	1	33	1	0	1	0	1	0	3	0	0	2
351	0	0	31	1	56	1	0	0	1	0	1	4	0	0	2
352	0	0	27	0	27	1	1	1	0	1	1	3	0	0	2
353	2	0	65	0	65	0	0	1	0	0	1	3	1	0	3
354	0	0	34	0	34	0	0	1	0	0	1	3	0	0	2
355	0	0	46	0	46	0	0	1	0	1	1	3	1	0	3
356	0	0	34	1	38	1	1	1	0	1	1	4	1	0	3
357	0	0	13	1	36	1	0	0	0	0	0	4	0	0	2
358	0	0	23	1	35	1	1	0	0	1	1	2	1	0	3
359	0	0	19	0	19	1	0	1	1	1	1	4	0	0	2
360	0	0	68	0	68	0	0	0	1	0	1	4	0	0	2
361	0	0	58	0	58	0	0	0	0	0	1	3	0	0	2
362	0	0	65	0	65	0	0	1	0	0	1	3	0	0	2
363	0	0	44	0	44	0	1	0	0	1	1	4	2	0	3
364	0	0	38	0	38	0	0	0	0	1	0	3	0	0	2
365	0	0	37	0	37	0	0	0	0	0	1	3	1	0	3
366	0	0	42	0	42	0	1	0	0	0	1	3	0	0	2
367	0	0	39	0	39	0	0	0	0	1	1	3	1	0	3
368	0	0	76	0	76	0	0	0	0	1	0	2	0	0	1
369	0	0	61	0	61	0	1	1	0	0	0	3	0	0	2
370	0	0	68	0	68	0	0	0	0	0	1	3	0	0	2
371	0	0	50	0	50	0	1	0	0	1	1	3	1	0	3
372	0	0	44	0	44	0	0	0	0	0	1	3	2	0	3
373	0	0	43	0	43	0	1	0	0	0	1	2	0	0	1
374	0	0	36	0	36	0	0	1	1	0	1	2	1	0	3
375	0	0	61	0	61	0	1	1	0	0	1	4	2	0	3
376	0	0	84	0	84	0	0	1	1	1	1	3	2	0	3
377	0	0	60	0	60	0	1	0	0	0	1	2	0	0	1
378	0	0	48	0	48	0	1	0	0	0	1	3	2	0	3
379	0	0	79	0	79	0	0	0	1	0	0	3	0	0	2
380	0	0	87	0	87	0	0	0	1	0	0	3	0	0	2
381	0	0	48	0	48	0	0	1	0	0	1	3	0	0	2
382	0	0	8	1	9	1	0	0	0	1	1	4	2	0	3
383	0	0	36	0	36	1	1	1	0	0	1	3	1	0	3
384	0	0	23	1	32	1	0	0	0	1	1	3	1	0	3
385	0	0	59	0	59	0	0	0	0	0	1	4	0	0	2
386	0	0	64	0	64	0	0	1	0	0	1	3	1	0	3
387	0	0	68	0	68	0	1	1	0	0	1	3	0	0	2
388	0	0	43	0	43	0	0	0	0	0	1	2	1	0	3
389	0	0	17	0	17	1	1	1	0	1	0	3	0	0	2
390	0	0	57	0	57	0	1	0	0	1	1	4	1	0	3
391	0	0	53	0	53	0	0	0	0	1	0	3	0	0	2
392	0	0	15	1	25	1	1	0	0	0	1	4	1	0	3
393	0	0	18	0	18	1	1	0	0	0	1	3	0	0	2
394	0	0	12	0	12	1	0	1	1	0	1	4	0	0	2
395	0	0	85	0	85	0	0	0	0	0	1	4	2	0	3
396	0	0	81	0	81	0	0	1	0	1	1	3	0	0	2
397	0	0	61	0	61	0	0	0	0	0	1	3	0	0	2
398	0	0	82	0	82	0	0	1	1	0	1	4	0	0	2
399	0	0	78	0	78	0	1	1	0	0	1	3	0	0	2
400	0	0	62	0	62	0	1	0	0	1	0	4	0	0	2
401	0	0	9	1	23	1	0	1	0	0	1	3	0	0	2
402	0	0	47	0	47	0	0	1	0	1	0	3	0	0	2
403	0	0	57	0	57	0	0	0	0	0	1	2	0	0	1
404	0	0	52	0	52	0	1	1	0	1	0	3	0	0	2
405	0	0	34	0	34	0	0	1	0	1	1	3	0	0	2
406	0	0	43	0	43	0	0	1	0	0	1	3	0	0	2
407	0	0	59	0	59	0	0	1	0	0	1	3	0	0	2
408	0	0	60	0	60	0	0	1	0	1	1	3	0	0	2
409	0	0	44	0	44	0	0	0	0	0	1	3	2	0	3
410	0	0	61	0	61	0	1	1	0	1	1	4	2	0	3
411	0	0	84	0	84	0	0	0	0	0	1	4	1	0	3
412	0	0	66	0	66	0	1	1	0	0	1	3	0	0	2
413	0	0	41	0	41	0	1	1	0	0	1	3	0	0	2
414	0	0	37	0	37	0	0	0	0	1	1	3	0	0	2
415	0	0	77	0	77	0	1	0	0	1	1	4	0	0	2
416	0	0	85	0	85	0	1	1	1	1	1	3	0	0	2
417	0	0	54	0	54	0	1	1	0	1	1	3	0	0	2
418	0	0	5	1	22	1	0	0	0	0	1	3	1	0	3
419	0	0	24	0	24	1	0	1	0	1	1	3	0	0	2
420	0	0	54	0	54	0	1	1	0	1	1	3	0	0	2
421	0	0	41	0	41	0	1	0	0	0	1	2	0	0	1
422	0	0	45	0	45	0	0	1	0	1	1	3	0	0	2
423	0	0	48	0	48	0	1	0	0	0	0	3	0	0	2
424	0	0	43	0	43	0	1	1	0	0	1	3	1	0	3
425	0	0	84	0	84	0	1	1	0	0	1	3	0	0	2
426	0	0	18	0	18	1	0	0	0	0	1	3	2	0	3
427	0	0	1	1	56	1	0	1	0	1	1	4	1	0	3
428	0	0	33	1	37	1	0	0	0	0	1	4	2	0	3
429	0	0	44	0	44	0	0	1	1	0	0	3	1	0	3
430	0	0	71	0	71	0	1	1	0	0	1	4	2	0	3
431	0	0	47	0	47	0	1	0	0	0	1	4	2	0	3
432	0	0	41	0	41	0	1	0	0	0	1	3	0	0	2
433	0	0	66	0	66	0	0	0	0	0	1	4	0	0	2
434	0	0	37	0	37	0	0	1	0	1	1	2	0	0	1
435	0	0	37	0	37	0	0	1	0	0	1	2	0	0	1
436	0	0	47	0	47	0	0	1	0	1	1	3	1	0	3
437	0	0	35	0	35	0	0	0	0	0	0	3	0	0	2
438	0	0	27	0	27	1	0	0	1	1	1	3	0	0	2
439	0	0	62	0	62	0	1	0	0	1	0	4	0	0	2
440	0	0	69	0	69	0	0	1	0	0	1	3	0	0	2
441	0	0	47	0	47	0	0	1	0	0	1	2	0	0	1
442	0	0	66	0	66	0	1	0	0	0	1	4	1	0	3
443	0	0	66	0	66	0	1	0	0	0	1	3	0	0	2
444	0	0	57	0	57	0	0	0	0	0	1	3	0	0	2
445	1	0	51	0	51	0	1	0	0	1	1	3	2	0	3
446	2	0	21	0	21	1	0	1	0	0	1	3	0	0	2
447	0	0	38	0	38	0	0	0	0	0	0	3	0	0	2
448	0	0	70	0	70	0	0	1	0	1	1	2	2	0	3
449	0	0	74	0	74	0	0	0	0	1	1	3	0	0	2
450	0	0	48	0	48	0	0	0	1	0	1	3	0	0	2
451	0	0	40	0	40	0	1	0	0	1	1	3	0	0	2
452	0	0	42	0	42	0	1	0	0	0	1	2	0	0	1
453	0	0	35	0	35	0	1	0	0	1	1	3	2	0	3
454	0	0	21	1	27	1	1	0	0	1	1	4	1	0	3
455	0	0	35	0	35	0	1	0	0	1	1	4	1	0	3
456	0	0	53	0	53	0	0	1	0	0	1	2	1	0	3
457	0	0	40	0	40	0	1	0	1	0	0	3	1	0	3
458	0	0	62	0	62	0	0	1	0	0	0	3	0	0	2
459	0	0	66	0	66	0	0	0	0	0	1	3	0	0	2
460	0	0	42	0	42	0	1	0	0	1	1	3	1	0	3
461	0	0	89	0	89	0	1	1	0	0	1	2	1	0	3
462	0	0	65	0	65	0	1	1	0	0	1	3	1	0	3
463	0	0	66	0	66	0	0	1	0	0	1	2	0	0	1
464	0	0	5	1	16	1	0	1	0	1	0	4	1	0	3
465	0	0	20	1	25	1	1	0	1	1	1	4	0	0	2
466	0	0	70	0	70	0	1	0	0	0	1	3	1	0	3
467	0	0	62	0	62	0	0	0	0	0	1	2	0	0	1
468	0	0	69	0	69	0	0	0	0	0	1	3	0	0	2
469	0	0	34	0	34	0	1	1	0	1	0	3	0	0	2
470	0	0	29	0	29	1	1	0	0	1	1	3	0	0	2
471	0	0	7	1	11	1	0	1	0	0	1	4	0	0	2
472	0	0	13	1	37	0	1	0	0	1	1	3	0	0	2
473	0	0	43	0	43	0	1	0	1	0	1	3	0	0	2
474	0	0	47	0	47	0	1	1	0	0	1	3	0	0	2
475	0	0	53	0	53	0	0	0	1	0	1	4	0	0	2
476	0	0	57	0	57	0	0	0	0	0	0	3	2	0	3
477	0	0	71	0	71	0	1	1	0	1	1	3	0	0	2
478	0	0	43	0	43	0	1	0	0	1	1	3	0	0	2
479	0	0	6	1	24	1	1	1	0	0	1	4	2	0	3
480	0	0	17	1	19	1	1	0	0	0	1	3	1	0	3
481	0	0	49	0	49	0	0	1	0	1	1	3	1	0	3
482	0	0	69	0	69	0	0	1	0	1	1	3	0	0	2
483	0	0	50	0	50	0	0	1	0	0	0	3	1	0	3
484	0	0	72	0	72	0	0	0	1	1	0	3	1	0	3
485	0	0	73	0	73	0	0	1	0	0	1	3	0	0	2
486	0	0	68	0	68	0	0	1	0	0	0	3	0	0	2
487	0	0	6	1	35	1	0	1	1	0	1	4	1	0	3
488	0	0	5	1	22	1	0	0	0	1	1	4	1	0	3
489	0	0	22	0	22	1	0	1	0	0	1	4	1	0	3
490	0	0	22	1	22	1	0	1	1	0	1	3	0	0	2
491	0	0	59	0	59	0	0	0	1	0	0	3	0	0	2
492	0	0	55	0	55	0	0	1	0	0	1	3	1	0	3
493	0	0	48	0	48	0	0	1	0	1	1	3	0	0	2
494	0	0	39	0	39	0	1	1	1	0	0	2	0	0	1
495	0	0	55	0	55	0	0	0	0	0	0	4	0	0	2
496	0	0	72	0	72	0	0	0	0	1	1	4	2	0	3
497	0	0	79	0	79	0	0	0	0	0	1	3	1	0	3
498	0	0	81	0	81	0	1	1	1	1	0	4	1	0	3
499	0	0	79	0	79	0	1	1	0	0	1	3	1	0	3
500	0	0	59	0	59	0	0	1	0	1	1	3	0	0	2
501	0	0	39	0	39	0	1	0	0	1	1	3	0	0	2
502	0	0	58	0	58	0	1	1	1	0	0	3	0	0	2
503	0	0	36	0	36	0	1	0	1	0	0	3	0	0	2
504	0	0	82	0	82	0	1	0	0	1	1	2	0	0	1
505	0	0	28	1	38	1	0	1	0	0	1	4	0	0	2
506	1	0	28	1	33	1	1	0	0	0	1	4	1	0	3
507	0	0	83	0	83	0	0	1	0	1	1	2	1	0	3
508	0	0	74	0	74	0	1	0	1	0	0	4	0	0	2
509	0	0	61	0	61	0	0	1	0	0	1	3	0	0	2
510	0	0	36	0	36	0	0	1	1	0	1	2	1	0	3
511	0	0	86	0	86	0	1	1	1	0	1	3	1	0	3
512	0	0	46	0	46	0	0	1	0	0	0	4	0	0	2
513	0	0	54	0	54	0	1	0	1	0	0	3	0	0	2
514	0	0	45	0	45	0	1	1	0	0	0	4	0	0	2
515	0	0	84	0	84	0	0	0	0	1	1	3	0	0	2
516	0	0	55	0	55	0	0	1	1	1	1	3	1	0	3
517	0	0	44	0	44	0	0	0	1	1	1	3	0	0	2
518	0	0	65	0	65	0	0	0	0	0	1	2	0	0	1
519	0	0	71	0	71	0	0	0	1	0	0	3	1	0	3
520	0	0	83	0	83	0	1	0	0	0	1	3	0	0	2
521	0	0	84	0	84	0	1	0	0	1	0	2	1	0	3
522	0	0	53	0	53	0	1	1	0	0	1	3	0	0	2
523	0	0	38	0	38	0	1	0	0	0	1	3	0	0	2
524	0	0	46	0	46	0	0	1	1	1	1	2	0	0	1
525	0	0	38	1	53	1	1	1	0	1	0	4	1	0	3
526	0	0	40	1	41	1	1	1	0	1	1	3	0	0	2
527	0	0	39	0	39	0	1	1	1	1	1	3	0	0	2
528	0	0	48	0	48	0	0	1	0	1	1	2	1	0	3
529	0	0	42	0	42	0	1	0	0	0	1	2	0	0	1
530	0	0	55	0	55	0	1	0	0	0	0	3	1	0	3
531	0	0	56	0	56	0	1	1	0	0	1	3	0	0	2
532	0	0	58	0	58	0	1	1	0	0	1	3	0	0	2
533	0	0	94	0	94	0	1	0	0	0	0	3	0	0	2
534	0	0	37	0	37	0	1	1	0	1	0	3	2	0	3
535	0	0	40	0	40	0	0	0	1	0	1	2	0	0	1
536	0	0	39	0	39	0	0	1	0	0	1	3	0	0	2
537	0	0	37	0	37	0	0	0	0	1	0	4	0	0	2
538	0	0	40	0	40	0	1	1	0	1	1	3	1	0	3
539	0	0	37	0	37	0	1	0	1	0	1	3	1	0	3
540	0	0	92	0	92	0	0	0	0	0	1	3	0	0	2
541	0	0	5	1	47	1	0	1	0	1	1	4	0	1	4
542	0	0	20	0	20	1	0	0	0	0	1	3	0	0	2
543	0	0	21	0	21	1	0	1	0	0	1	3	0	0	2
544	0	0	94	0	94	0	1	0	1	0	1	3	0	0	2
545	0	0	58	0	58	0	1	1	0	0	0	4	2	0	3
546	0	0	79	0	79	0	1	0	0	0	1	3	1	0	3
547	0	0	52	0	52	0	0	1	1	0	1	3	1	0	3
548	0	0	62	0	62	0	0	0	0	0	1	3	0	0	2
549	0	0	43	0	43	0	1	1	0	0	0	3	0	0	2
550	0	0	44	0	44	0	0	1	0	0	1	3	0	0	2
551	0	0	44	0	44	0	0	1	1	0	0	4	1	0	3
552	0	0	39	0	39	0	1	0	1	0	1	3	0	0	2
553	0	0	46	0	46	0	1	0	1	1	0	3	0	0	2
554	0	0	53	0	53	0	0	0	1	0	0	3	0	0	2
555	0	0	44	0	44	1	1	1	0	0	1	4	2	0	3
556	0	0	13	1	32	1	1	1	1	1	1	3	1	0	3
557	0	0	73	0	73	1	1	1	0	1	1	3	0	0	2
558	0	0	41	0	41	0	0	0	0	1	1	3	0	0	2
559	0	0	84	0	84	0	0	0	0	0	1	3	2	0	3
560	0	0	55	0	55	0	1	1	0	0	1	4	1	0	3
561	0	0	76	0	76	0	0	0	0	0	1	3	2	0	3
562	0	0	63	0	63	0	0	0	0	0	1	2	0	0	1
563	0	0	46	0	46	0	1	0	0	1	1	2	0	0	1
564	0	0	61	0	61	0	1	0	0	0	1	2	0	0	1
565	0	0	44	0	44	0	1	1	0	1	1	3	0	0	2
566	0	0	36	0	36	0	0	0	0	0	1	4	0	0	2
567	0	0	68	0	68	0	1	0	0	1	0	4	0	0	2
568	0	0	59	0	59	0	1	0	0	0	0	3	0	0	2
569	0	0	76	1	76	1	1	1	1	1	0	3	0	0	2
570	0	0	26	1	26	1	1	0	1	0	0	3	1	0	3
571	0	0	37	1	46	1	0	0	0	1	1	4	1	0	3
572	0	0	1	1	27	1	0	1	0	0	1	4	1	0	3
573	2	0	60	0	60	0	0	0	0	0	1	3	0	0	2
574	0	0	43	0	43	0	0	0	0	1	1	3	2	0	3
575	0	0	34	0	34	0	0	1	0	0	1	4	0	0	2
576	0	0	78	0	78	0	1	0	0	0	1	3	1	0	3
577	0	0	37	0	37	0	0	0	0	0	1	3	0	0	2
578	0	0	50	0	50	0	1	1	0	1	1	3	2	0	3
579	0	0	68	0	68	0	0	1	0	0	1	4	2	0	3
580	0	0	35	0	35	0	1	0	0	0	1	3	0	0	2
581	0	0	45	0	45	0	1	0	1	0	1	3	0	0	2
582	0	0	77	0	77	0	0	0	0	0	1	3	2	0	3
583	0	0	59	0	59	0	0	1	0	0	1	2	0	0	1
584	0	0	35	0	35	0	0	1	0	1	1	2	0	0	1
585	0	0	79	0	79	0	1	0	0	0	0	4	0	0	2
586	0	0	52	0	52	0	0	0	0	0	1	3	2	0	3
587	0	0	84	0	84	0	0	1	1	0	1	3	0	0	2
588	0	0	85	0	85	0	0	0	0	0	1	4	1	0	3
589	0	0	14	1	31	1	0	1	1	1	1	3	2	0	3
590	0	0	61	0	61	0	0	0	0	1	1	4	0	0	2
591	0	0	62	0	62	0	1	1	0	1	1	4	2	0	3
592	0	0	80	0	80	0	0	0	0	0	1	4	0	0	2
593	0	0	44	0	44	0	0	1	1	0	0	3	0	0	2
594	0	0	39	0	39	0	1	0	0	0	1	3	0	0	2
595	0	0	71	0	71	0	1	0	1	1	1	3	1	0	3
596	0	0	37	0	37	0	0	0	0	0	1	3	0	0	2
597	0	0	70	0	70	0	0	1	0	1	1	3	1	0	3
598	0	0	61	0	61	0	1	1	0	0	1	4	1	0	3
599	0	0	89	0	89	0	0	1	1	1	1	3	0	0	2
600	0	0	60	0	60	0	0	1	0	1	0	4	1	0	3
601	0	0	38	0	38	0	0	0	0	0	1	3	1	0	3
602	0	0	25	1	31	1	0	1	1	1	1	3	1	0	3
603	0	0	71	0	71	1	1	0	0	0	1	3	1	0	3
604	0	0	22	1	22	1	0	1	0	1	1	3	0	0	2
605	0	0	26	0	26	1	0	0	0	0	1	4	0	0	2
606	0	0	21	0	21	1	0	0	0	1	1	3	0	0	2
607	2	0	60	0	60	1	0	1	0	0	1	4	0	0	2
608	0	0	67	0	67	0	1	1	0	1	0	4	1	0	3
609	0	0	62	0	62	0	0	0	0	0	1	4	0	0	2
610	0	0	69	0	69	0	0	1	0	1	1	4	1	0	3
611	0	0	87	0	87	0	0	0	0	0	1	3	1	0	3
612	0	0	68	0	68	0	0	0	0	1	0	4	0	0	2
613	0	0	59	0	59	0	0	1	1	0	1	2	0	0	1
614	0	0	54	0	54	0	0	0	0	1	0	2	0	0	1
615	0	0	52	0	52	0	0	0	0	1	0	4	0	0	2
616	0	0	53	0	53	0	1	0	0	0	1	4	1	0	3
617	0	0	52	0	52	0	0	0	0	1	1	3	0	0	2
618	0	0	68	0	68	0	1	0	0	0	1	4	2	0	3
619	0	0	78	0	78	1	1	0	1	1	1	3	0	0	2
620	0	0	26	1	48	1	1	0	0	1	1	4	1	1	4
621	0	0	11	1	11	1	0	1	1	1	0	4	1	0	3
622	0	0	15	1	25	1	0	0	1	0	1	3	0	0	2
623	0	0	19	1	27	1	0	1	0	0	1	4	0	0	2
624	0	0	35	0	35	1	1	1	0	0	1	3	0	0	2
625	0	0	19	0	19	1	1	1	0	0	1	3	0	0	2
626	1	0	96	0	96	0	0	0	1	0	0	3	0	0	2
627	0	0	36	0	36	0	0	0	0	1	1	3	0	0	2
628	0	0	54	0	54	0	1	0	1	0	1	4	0	0	2
629	0	0	58	0	58	0	0	0	0	0	1	3	0	0	2
630	0	0	58	0	58	0	0	0	0	0	1	3	0	0	2
631	0	0	60	0	60	0	1	0	1	0	1	3	0	0	2
632	0	0	62	0	62	0	1	0	0	0	1	4	0	0	2
633	0	0	60	0	60	0	0	1	0	1	1	4	1	0	3
634	0	0	59	0	59	0	0	0	0	0	1	2	1	0	3
635	0	0	89	0	89	0	1	0	0	0	1	3	0	0	2
636	0	0	62	0	62	0	0	0	0	0	0	4	0	0	2
637	0	0	53	0	53	0	0	0	1	1	1	3	0	0	2
638	0	0	67	0	67	0	1	0	0	1	1	3	0	0	2
639	0	0	11	1	45	1	1	1	0	0	1	3	2	0	3
640	0	0	31	1	51	1	0	1	0	0	1	3	0	0	2
641	0	0	25	1	26	1	1	1	0	0	1	4	0	0	2
642	0	0	91	0	91	0	0	1	1	0	1	3	2	0	3
643	0	0	57	0	57	0	1	0	0	0	0	3	0	0	2
644	0	0	52	0	52	0	1	1	0	0	1	3	0	0	2
645	0	0	61	0	61	0	1	1	0	0	1	2	0	0	1
646	0	0	63	0	63	0	1	1	0	0	0	4	1	0	3
647	0	0	53	0	53	0	1	0	0	1	1	3	0	0	2
648	0	0	58	0	58	0	1	1	0	0	1	2	0	0	1
649	0	0	58	0	58	0	0	0	0	1	0	3	0	0	2
650	0	0	59	0	59	0	0	1	0	1	1	3	0	0	2
651	0	0	53	0	53	0	1	1	0	0	1	3	0	0	2
652	0	0	59	0	59	0	1	0	0	0	1	2	0	0	1
653	0	0	6	1	31	1	0	0	0	0	1	3	0	0	2
654	1	0	41	0	41	0	0	1	0	1	1	2	1	0	3
655	2	0	67	0	67	0	1	0	0	0	1	3	1	0	3
656	0	0	47	0	47	0	1	1	0	1	1	3	0	0	2
657	0	0	38	0	38	0	1	0	0	0	1	4	1	0	3
658	0	0	61	0	61	0	1	1	0	0	1	2	0	0	1
659	0	0	58	0	58	0	0	0	0	0	1	2	0	0	1
660	0	0	74	0	74	0	0	1	0	1	1	3	0	0	2
661	0	0	89	0	89	0	0	1	0	0	1	3	1	0	3
662	0	0	91	0	91	0	0	0	1	0	1	3	1	0	3
663	0	0	38	0	38	0	1	1	1	0	0	3	0	0	2
664	0	0	90	0	90	0	0	0	1	1	1	3	0	0	2
665	0	0	19	0	19	1	0	1	1	1	1	3	0	0	2
666	0	0	31	1	32	1	0	1	0	1	1	3	1	0	3
667	0	0	14	1	33	1	1	1	0	0	0	4	1	0	3
668	0	0	41	0	41	1	0	1	0	1	1	3	1	0	3
669	2	0	96	0	96	0	0	0	0	1	1	2	1	0	3
670	0	0	53	0	53	0	1	0	0	1	1	4	0	0	2
671	0	0	56	0	56	0	1	0	0	0	0	3	0	0	2
672	0	0	36	0	36	0	0	0	1	1	1	2	0	0	1
673	0	0	88	0	88	0	0	0	0	1	1	3	0	0	2
674	0	0	35	0	35	0	0	1	0	0	1	3	0	0	2
675	0	0	53	0	53	0	1	0	0	0	1	3	1	0	3
676	0	0	45	0	45	0	0	1	0	0	0	3	0	0	2
677	0	0	47	0	47	0	0	0	1	0	1	2	0	0	1
678	0	0	62	0	62	0	1	0	0	0	1	2	0	0	1
679	0	0	93	0	93	0	1	0	1	1	0	4	2	0	3
680	0	0	52	0	52	0	0	0	0	0	1	3	0	0	2
681	0	0	41	0	41	1	1	1	0	1	1	4	0	0	2
682	1	0	71	0	71	0	0	1	0	1	0	4	1	0	3
683	0	0	39	0	39	0	0	1	1	1	1	3	1	0	3
684	0	0	12	0	12	1	1	0	0	0	1	4	0	0	2
685	0	0	24	0	24	1	1	1	0	1	1	3	0	0	2
686	0	0	3	1	58	1	0	0	0	0	1	4	0	0	2
687	0	0	14	0	14	1	1	0	1	0	1	3	0	0	2
688	0	0	23	0	23	1	0	1	0	1	1	3	0	0	2
689	0	0	19	0	19	1	0	0	0	0	0	3	0	0	2
690	0	0	31	0	31	1	1	0	0	0	1	4	0	0	2
691	1	0	29	1	30	1	0	1	0	1	0	3	2	0	3
692	1	0	99	0	99	0	0	0	0	1	1	4	0	0	2
693	1	0	83	0	83	0	0	0	1	0	1	3	1	0	3
694	0	0	39	0	39	0	0	0	0	0	1	2	0	0	1
695	0	0	57	0	57	0	0	1	0	0	1	2	0	0	1
696	0	0	39	0	39	0	1	1	0	1	0	3	1	0	3
697	0	0	19	0	19	1	1	0	0	0	0	3	0	0	2
698	0	0	18	0	18	1	0	0	0	0	1	3	0	0	2
699	0	0	34	0	34	1	1	1	0	0	1	3	0	0	2
700	2	0	97	0	97	0	1	0	0	0	1	2	0	0	1
701	2	0	23	1	97	0	0	0	0	1	1	4	0	0	2
702	1	0	68	0	68	0	0	0	0	0	1	3	0	0	2
703	1	0	35	1	40	1	0	0	0	1	1	4	1	0	3
704	0	0	40	0	40	0	0	0	0	0	1	3	2	0	3
705	0	0	3	1	6	1	0	0	0	1	1	4	2	1	4
706	0	0	32	1	33	1	0	0	0	1	0	3	1	1	4
707	0	0	55	0	55	0	1	0	0	0	0	3	1	0	3
708	0	0	15	0	15	1	0	1	0	1	1	3	0	0	2
709	0	0	36	0	36	1	0	1	0	0	1	3	0	0	2
710	0	0	33	0	33	1	0	0	1	0	0	4	0	0	2
711	0	0	34	0	34	0	0	0	0	0	1	2	2	0	3
712	0	0	35	0	35	1	0	1	1	1	1	3	2	0	3
713	0	0	3	1	65	0	0	0	0	1	1	4	0	1	4
714	0	0	26	0	26	1	1	0	0	0	1	4	1	1	4
715	2	0	57	0	57	0	0	1	0	0	1	3	2	0	3
716	0	0	5	1	15	1	1	0	0	0	1	3	0	0	2
717	0	0	87	0	87	0	0	0	0	1	0	3	0	0	2
718	0	0	87	0	87	0	0	0	0	0	1	3	1	0	3
719	0	0	11	1	11	1	1	0	1	0	0	3	1	0	3
720	0	0	65	0	65	0	1	0	0	0	1	4	1	0	3
721	0	0	84	0	84	0	0	0	0	0	1	3	2	0	3
722	0	0	80	0	80	0	1	1	0	0	1	3	0	0	2
723	0	0	48	0	48	0	0	1	0	0	1	3	0	0	2
724	0	0	91	0	91	0	0	0	1	0	0	4	0	0	2
725	0	0	51	0	51	0	1	0	0	0	0	3	0	0	2
726	0	0	19	1	21	1	0	1	1	0	1	3	2	0	3
727	0	0	49	0	49	0	0	0	0	0	1	2	1	0	3
728	1	0	60	0	60	0	1	1	0	1	0	4	0	0	2
729	0	0	36	0	36	1	1	1	0	1	1	3	0	0	2
730	0	0	60	0	60	0	1	1	0	1	0	2	0	0	1
731	0	0	44	0	44	0	0	1	1	1	0	3	0	0	2
732	0	0	43	0	43	0	0	0	0	1	1	2	0	0	1
733	0	0	73	0	73	0	0	0	0	1	1	3	0	0	2
734	0	0	16	0	16	1	0	1	0	1	0	3	0	0	2
735	0	0	74	0	74	1	0	0	0	1	1	3	0	0	2
736	0	0	78	0	78	0	0	0	0	1	0	3	0	0	2
737	0	0	25	1	28	1	0	1	0	1	0	3	1	0	3
738	0	0	86	0	86	0	0	1	0	1	1	4	1	0	3
739	0	0	48	1	54	1	0	0	0	1	1	2	1	0	3
740	1	0	98	0	98	0	0	0	1	1	1	4	1	0	3
741	0	0	35	0	35	0	0	0	0	1	1	3	1	0	3
742	0	0	51	0	51	0	1	0	1	1	1	3	0	0	2
743	0	0	83	0	83	0	1	0	0	1	1	4	2	0	3
744	0	0	87	0	87	0	1	0	1	1	1	3	1	0	3
745	0	0	35	0	35	0	0	1	0	1	1	3	0	0	2
746	0	0	49	0	49	0	1	1	0	1	1	4	0	0	2
747	0	0	82	0	82	0	0	0	0	1	1	3	0	0	2
748	0	0	71	0	71	0	0	1	0	1	1	3	0	0	2
749	0	0	79	0	79	0	0	0	0	1	1	3	0	0	2
750	0	0	78	0	78	0	1	1	0	1	1	3	0	0	2
751	0	0	59	0	59	0	0	1	1	1	1	3	0	0	2
752	0	0	46	0	46	0	1	0	0	1	1	3	1	0	3
753	0	0	73	0	73	0	0	1	0	1	0	3	1	0	3
754	0	0	82	0	82	0	1	0	1	1	0	3	0	0	2
755	0	0	85	0	85	0	1	0	1	1	1	4	2	0	3
756	0	0	80	0	80	0	1	1	1	1	0	3	1	0	3
757	0	0	48	0	48	0	0	1	0	1	1	3	0	0	2
758	0	0	88	0	88	0	1	1	0	1	1	3	0	0	2
759	0	0	84	0	84	0	0	1	0	1	1	3	1	0	3
760	0	0	83	0	83	0	1	0	0	1	1	3	1	0	3
761	0	0	84	0	84	0	0	0	0	1	1	2	1	0	3
762	1	0	4	1	22	1	0	0	0	1	1	4	2	0	3
763	1	0	97	0	97	0	1	0	0	1	1	3	0	0	2
764	0	0	36	0	36	0	0	0	0	1	0	3	2	0	3
765	0	0	82	0	82	0	1	0	0	1	1	3	1	0	3
766	0	0	87	0	87	0	1	0	0	1	1	2	1	0	3
767	0	0	54	0	54	0	1	1	1	1	1	2	0	0	1
768	0	0	76	0	76	0	1	1	0	0	1	3	1	0	3
769	0	0	84	0	84	0	1	0	0	1	1	3	0	0	2
770	0	0	93	0	93	0	0	1	1	1	1	3	0	0	2
771	0	0	11	1	46	1	1	0	1	1	1	3	1	0	3
772	0	0	73	0	73	1	0	0	0	1	0	3	0	0	2
773	0	0	53	0	53	0	0	0	0	0	1	3	0	0	2
774	0	0	13	1	24	1	0	1	0	1	1	4	1	0	3
775	1	0	30	1	97	0	1	0	1	1	1	3	0	0	2
776	0	0	94	0	94	0	0	1	0	1	1	3	0	0	2
777	0	0	53	0	53	1	1	0	0	1	0	3	0	0	2
778	1	0	96	0	96	0	1	0	1	0	1	2	1	0	3
779	2	0	63	0	63	0	0	0	0	0	1	3	0	0	2
780	0	0	54	0	54	0	0	0	0	1	1	3	1	0	3
781	0	0	39	0	39	0	0	0	0	1	0	3	1	0	3
782	0	0	12	0	12	1	1	0	0	1	0	4	1	0	3
783	1	0	97	0	97	0	1	0	1	1	0	2	1	0	3
784	0	0	13	0	13	1	0	0	1	1	1	4	0	0	2
785	0	0	79	0	79	1	0	1	1	1	0	3	0	0	2
786	2	0	97	0	97	0	0	0	1	1	1	4	0	0	2
787	3	1	15	1	41	1	0	0	0	0	1	4	1	0	3
788	2	1	60	0	60	1	1	0	0	0	1	3	2	0	3
789	3	1	68	0	68	0	1	0	0	0	1	4	1	1	4
790	3	1	30	0	30	1	0	1	0	1	1	3	0	0	2
791	3	1	38	0	38	0	1	1	0	0	0	3	1	1	4
792	3	1	4	1	7	1	0	1	0	0	0	3	2	1	4
793	3	1	31	0	31	1	0	1	0	0	1	3	0	1	4
794	3	1	62	0	62	1	0	1	0	0	1	3	1	0	3
795	3	1	28	1	34	0	0	0	0	1	1	4	1	1	4
796	3	1	32	0	32	0	0	1	0	1	1	3	1	0	3
797	3	1	12	1	29	0	1	1	0	1	0	3	0	1	4
798	2	1	34	0	34	0	0	1	0	1	1	3	0	0	2
799	3	1	15	0	15	0	1	0	0	0	1	3	0	0	2
800	3	1	17	0	17	0	0	0	0	0	1	3	1	1	4
801	3	1	20	0	20	0	0	1	0	1	1	3	0	0	2
802	3	1	14	0	14	0	0	1	0	1	1	3	0	0	2
803	3	1	9	0	9	0	1	0	0	0	1	3	1	0	3
804	3	1	7	0	7	0	0	1	1	0	1	3	1	0	3
805	3	1	11	0	11	0	1	1	0	1	1	3	1	1	4
806	3	1	16	0	16	0	1	0	0	1	0	3	0	0	2
807	3	1	7	1	16	1	0	0	0	1	1	3	2	1	4
808	3	1	15	0	15	0	0	1	0	1	1	3	1	0	3
809	3	1	3	1	9	1	0	1	1	1	1	4	0	0	2
810	3	1	31	0	31	0	1	1	0	0	1	2	0	0	1
811	3	1	31	0	31	0	1	0	0	1	1	3	0	0	2
812	2	1	4	0	4	0	1	1	1	0	0	3	0	0	2

## Sheet: TIME and Gene and PD-L1
IHC-HER2	FISH-HER2	PFS（month）	serial number（0=NO；1=YES）	OS（month）	Survival（0=YES；1=NO）	CD3（IT)	CD3（TR）	CD3 + CD4 +（IT)	CD3 + CD4 +（TR）	CD8（IT)	CD8（TR）	FoxP3（IT)	FoxP3（TR）	PD-1 + CD8 +（IT)	PD-1 + CD8 +（TR）	CD3 + CD4 + FoxP3 + （IT)	CD3 + CD4 + FoxP3 + （TR）	CD68 + CD163 +（IT)	CD68 + CD163 +（TR）	CD68 + CD163 - （IT)	CD68 + CD163 - （TR）	PD-L1 + CD68 +（IT)	PD-L1 + CD68 +（TR）	CD56bright（IT)	CD56bright（TR）	CD56dim （IT)	CD56dim （TR）	CD20（IT)	CD20（TR）	TLS	TPS(0,<1;1,>=1)	CPS(0,<1;1,>=1)	AKT3(mutation=1，Wild-type=0）	MAP2K1(mutation=1，Wild-type=0）	FBXW7(mutation=1，Wild-type=0）	ROS1(mutation=1，Wild-type=0）	KRAS(mutation=1，Wild-type=0）	ERBB3(mutation=1，Wild-type=0）	APC(mutation=1，Wild-type=0）	TP53(mutation=1，Wild-type=0）	EGFR(mutation=1，Wild-type=0）	PIK3CA(mutation=1，Wild-type=0）
1	1	4	1	7	1	125	206	78	106	26	49	31	36	3	1	22	15	3	6	53	368	0	0	0	0	0	0	2	22	0.1	1	1	0	0	0	0	0	1	0	0	0	0
1	1	32	0	32	0	350	279	5	3	11	38	67	39	0	0	2	1	0	2	6	32	1	2	0	0	0	0	7	11	0	1	1	0	1	0	1	1	1	1	1	1	1
1	1	12	1	29	0	131	244	21	25	7	54	18	81	0	1	5	2	5	8	34	57	2	0	1	2	2	11	1	24	0.54	1	1	0	0	0	0	0	0	0	1	1	1
1	1	62	0	62	1	130	435	44	135	24	30	66	206	0	0	21	49	2	1	13	114	0	0	7	2	70	53	1	14	0.19	1	1	0	1	1	1	0	0	0	1	0	0
1	1	15	1	41	1	183	141	5	7	98	31	7	6	5	1	1	0	18	374	60	1044	3	5	4	43	492	543	3	21	0.08	1	1	0	0	0	0	0	0	0	0	0	0
1	1	38	0	38	0	0	1	0	8	0	4	0	0	0	0	0	8	0	22	0	0	0	0	0	0	0	0	0	0	0.21	1	1	0	0	0	1	0	0	0	1	1	0
1	1	68	0	68	0	781	137	61	5	26	33	4	0	0	0	3	0	17	15	63	150	0	0	102	17	249	26	22	2	0	1	1	1	0	0	0	0	0	0	1	0	1
1	1	30	0	30	1	281	11	118	5	14	6	129	30	1	0	35	0	6	8	71	112	6	1	31	28	47	29	1	1	0	0	0	0	0	1	0	0	1	1	0	0	1
1	1	31	0	31	1	90	466	1	4	17	27	8	163	0	0	1	3	2	9	22	96	1	3	3	33	13	75	0	0	0.1	0	0	1	0	0	0	0	0	1	1	0	0
1	1	28	1	34	0	153	122	0	1	5	10	13	0	0	0	0	0	0	0	79	89	0	0	0	2	10	10	1	2	0	1	1	0	0	0	0	0	0	0	1	1	0
1	1	34	0	34	0	1078	1793	378	453	24	16	40	82	1	0	14	8	12	25	13	61	2	11	0	1	0	3	5	26	0.11	0	0	0	1	0	0	0	0	0	1	1	1
1	1	15	0	15	0	0	17	0	0	0	10	0	94	0	0	0	0	0	10	0	13	0	0	0	0	0	0	0	0	0.14	1	1	0	0	0	1	0	0	0	0	0	0
1	1	17	0	17	0	0	87	0	18	0	23	0	1	0	0	0	1	0	67	0	81	0	7	0	16	0	85	0	24	0.62	1	1	0	0	0	0	0	0	0	0	1	0
1	1	20	0	20	0	0	10	0	1	0	2	0	9	0	0	0	0	0	1	0	11	0	1	0	3	0	1	0	0	0	1	1	0	0	0	0	0	0	0	0	0	0
1	1	60	0	60	1	453	599	150	117	9	79	42	41	0	2	16	3	2	9	19	81	1	4	0	0	0	4	34	118	0.19	1	1	1	0	0	0	0	1	0	0	1	0
1	1	14	0	14	0	32	337	14	161	14	98	52	287	0	4	5	47	1	34	19	261	0	16	1	16	1	16	6	16	0.04	1	1	0	0	0	0	0	0	0	1	0	1
1	1	9	0	9	0	135	176	36	17	9	55	24	35	0	0	12	2	0	0	120	207	4	2	1	8	1226	592	2	8	0.03	1	1	0	0	0	0	0	0	1	1	0	0
1	1	7	0	7	0	1044	1023	96	19	54	60	280	18	3	1	19	1	5	19	46	273	0	0	0	0	0	0	12	5	0	1	1	0	0	0	0	0	0	1	1	0	0
1	1	11	0	11	0	0	97	0	5	0	58	0	5	0	0	0	0	0	2	0	1	0	0	0	25	0	14	0	1	0.36	1	1	0	0	0	0	0	0	1	0	0	0
1	1	16	0	16	0	448	101	151	40	127	16	95	66	2	0	27	5	6	7	93	86	0	0	0	0	0	0	7	7	0	1	1	0	0	0	0	1	0	0	0	0	0
1	1	7	1	16	1	99	290	31	64	32	180	73	235	3	9	18	27	0	2	13	15	0	0	0	0	0	1	5	37	0.19	1	1	0	0	0	0	0	0	0	1	0	1
1	1	15	0	15	0	506	514	94	155	253	113	51	89	14	2	33	31	18	35	39	125	13	20	0	14	0	3	5	18	0.04	1	1	0	0	0	0	1	0	1	1	0	0
1	1	3	1	9	1	486	72	1	1	93	10	35	19	0	0	1	0	2	4	57	135	4	3	0	0	0	0	0	0	0.02	1	1	0	0	0	0	0	0	0	0	0	0
1	1	31	0	31	0	0	85	0	8	0	97	0	4	0	0	0	0	0	5	0	24	0	0	0	0	0	9	0	4	0.14	0	0	0	0	1	0	0	0	0	0	0	0
1	1	31	0	31	0	331	294	114	112	155	43	177	219	3	0	87	49	27	26	137	135	5	6	0	1	0	1	11	48	0.05	0	0	0	0	0	0	1	0	0	1	0	1
1	1	4	0	4	0	733	298	253	67	34	128	110	101	1	7	74	5	28	105	42	201	40	202	0	0	0	0	10	17	0.06	0	0	0	0	0	0	0	0	0	0	0	0
0	0	39	0	39	0	155	57	60	12	35	69	24	3	0	1	16	0	46	223	54	201	3	8	0	0	11	62	3	16	0	1	1	0	0	1	0	0	0	0	0	1	0
0	0	39	0	39	0	0	0	0	0	16	73	0	0	0	0	0	0	0	0	47	154	1	0	0	0	0	0	0	0	0	1	1	0	0	0	0	0	0	0	0	0	0
0	0	39	0	39	0	183	878	0	0	0	0	13	110	0	0	4	39	0	0	0	0	0	0	0	2	21	173	1	0	0	0	0	1	0	0	0	0	0	0	0	1	0
0	0	57	0	57	0	0	0	0	0	112	645	0	0	13	62	0	0	43	229	47	137	15	32	0	0	0	0	0	0	0	1	1	0	0	0	0	0	0	0	0	1	0
0	0	39	0	39	0	1817	1786	0	0	0	0	124	251	0	0	36	34	0	0	0	0	0	0	0	1	16	70	136	147	0	0	0	0	1	1	0	0	0	0	0	0	0
0	0	39	0	39	0	0	0	0	0	35	69	0	0	0	1	0	0	46	223	54	201	3	8	0	0	0	0	0	0	0	1	1	0	0	0	0	0	0	0	0	0	0
0	0	13	1	37	0	155	57	0	0	0	0	24	3	0	0	0	0	0	0	0	0	0	0	0	0	11	62	3	16	0	0	0	0	0	0	0	0	0	0	0	0	0
0	0	57	0	57	0	475	533	60	12	0	0	53	38	0	0	9	6	0	0	0	0	0	0	0	0	317	506	16	13	0	0	0	0	0	0	1	0	0	0	0	0	0
0	0	40	0	40	0	0	0	0	0	24	92	0	0	0	3	0	0	3	3	130	173	12	10	0	0	0	0	0	0	0	1	1	0	0	0	0	1	0	0	0	0	0
0	0	34	0	34	0	776	102	0	0	0	0	293	41	0	0	1	0	0	0	0	0	0	0	680	33	421	15	381	10	0	0	0	0	0	0	0	1	0	0	0	0	0
0	0	35	0	35	0	0	0	0	0	52	43	0	0	19	4	0	0	78	72	410	177	31	5	0	0	0	0	0	0	0	0	2	0	0	0	0	1	0	0	0	0	0
0	0	35	0	35	1	753	565	0	0	0	0	29	59	0	0	14	15	0	0	0	0	0	0	0	1	3	4	16	80	0	0	0	0	0	1	0	1	0	0	0	1	0
0	0	39	0	39	0	0	0	0	0	10	68	0	0	0	0	0	0	7	52	195	237	6	13	0	0	0	0	0	0	0	1	1	0	0	0	0	1	0	0	0	0	0
0	0	39	0	39	0	0	0	0	0	42	85	0	0	1	5	0	0	35	82	61	182	4	16	0	0	0	0	0	0	0	0	1	0	0	0	0	1	0	0	0	0	0
0	0	3	1	65	0	199	257	0	0	0	0	123	422	0	0	19	56	0	0	0	0	0	0	1	6	1	7	4	6	0	0	0	0	0	0	0	1	0	0	0	1	0
0	0	3	1	6	1	0	0	0	0	459	12	0	0	0	0	0	0	36	22	378	90	35	66	0	0	0	0	0	0	0	1	1	0	0	0	0	1	0	0	0	0	0
0	0	26	0	26	1	2319	457	0	0	0	0	121	15	0	0	28	0	0	0	0	0	0	0	1	18	1001	448	14	16	0	0	0	0	0	1	0	1	0	0	1	0	0
0	0	47	0	47	0	0	0	0	0	456	344	0	0	74	64	0	0	175	176	855	1401	66	45	0	0	0	0	0	0	0	1	1	0	0	0	0	1	0	0	1	0	1
0	0	39	0	39	0	2299	2108	0	0	0	0	4780	647	0	0	786	320	0	0	0	0	0	0	7	5	45	14	503	99	0	0	0	0	0	0	0	1	0	0	1	0	1
0	0	12	0	12	1	0	0	0	0	140	23	0	0	15	1	0	0	181	70	447	329	29	11	0	0	0	0	0	0	0	1	1	0	0	0	0	0	0	1	1	1	1
0	0	32	1	33	1	1105	693	0	0	0	0	138	111	0	0	46	57	0	0	0	0	0	0	51	150	290	214	2	2	0	0	0	0	0	0	0	0	0	1	1	1	1
0	0	55	0	55	0	0	0	0	0	1	2	0	0	0	0	0	0	0	1	3	6	0	1	0	0	0	0	0	0	0	1	1	0	0	0	0	0	0	1	1	0	0
0	0	39	0	39	0	40	55	0	0	0	0	60	62	0	0	3	8	0	0	0	0	0	0	2	20	21	58	0	1	0	0	0	0	0	0	0	0	0	1	1	1	0
0	0	25	1	25	1	0	0	0	0	504	355	0	0	17	12	0	0	3	12	192	375	10	5	0	0	0	0	0	0	0	1	1	0	0	0	0	0	0	1	1	0	0
0	0	36	0	36	0	487	757	0	0	0	0	18	41	0	0	3	8	0	0	0	0	0	0	2	6	3	11	1	42	0	0	0	0	0	0	0	0	0	1	1	1	0
0	0	16	1	38	0	0	0	0	0	21	6	0	0	2	1	0	0	6	4	236	118	40	58	0	0	0	0	0	0	0	1	1	0	0	0	0	0	0	1	1	0	0
