# Supplementary material for: Somatic mutation profiling, tumor-infiltrating leukocytes, tertiary lymphoid structures and PD-L1 protein expression in HER2-amplified colorectal cancer
Source: PeerJ. 2023 May 2;11:e15261. doi: 10.7717/peerj.15261 (PMC10162038; doi:10.7717/peerj.15261)
Supplement: Supplemental Information 3 [file peerj-11-15261-s003.xls]

## Sheet: Sheet1
patient	Disease progression	Gene.refGene	Vcf_mut	InterVar_automated
1	Yes	XRCC5	chr2:216990704:C/T	Pathogenic
		TP53	chr17:7577539:G/A	Pathogenic
		TDP2	chr6:24653257:G/T	Pathogenic
		CCND3	chr6:41905097:C/T	Pathogenic
		WRN	chr8:30948373:C/T	Pathogenic
		JAK2	chr9:5022190:G/T	Likely pathogenic
		JAK2	chr9:5022213:G/T	Likely pathogenic
		PIK3R2	chr19:18278049:G/A	Likely pathogenic
		PIK3CA	chr3:178916944:A/G	Likely pathogenic
		EGFR	chr7:55242502:G/A	Likely pathogenic
2	Yes	EGFR	chr7:55242436:G/A	Likely pathogenic
		PRSS1	chr7:142459771:G/A	Likely pathogenic
		TP53	chr17:7578461:C/A	Likely pathogenic
3	Yes	RNF168	chr3:196214437:G/A	Pathogenic
		PRKAR1A	chr17:66511586:C/T	Pathogenic
		PTEN	chr10:89692992:G/A	Likely pathogenic
		ERBB3	chr12:56478861:G/A	Likely pathogenic
		BRCA2	chr13:32968855:G/A	Likely pathogenic
		RAD54B	chr8:95392477:T/A	Likely pathogenic
4	Yes	CDK12	chr17:37673781:C/T	Pathogenic
		REV3L	chr6:111643839:G/A	Pathogenic
		FLT1	chr13:28963948:C/A	Pathogenic
		PTEN	chr10:89692848:G/A	Pathogenic
		POLK	chr5:74882879:G/A	Likely pathogenic
		RAD54B	chr8:95411776:C/T	Likely pathogenic
		PRKAR1A	chr17:66526448:G/A	Likely pathogenic
5	Yes	ZNRF3	chr22:29446744:C/T	Pathogenic
		ERCC2	chr19:45867010:T/G	Likely pathogenic
		FANCA	chr16:89857866:C/T	Likely pathogenic
6	Yes	TP53	chr17:7578406:C/T	Pathogenic
		PIK3CA	chr3:178916936:G/A	Likely pathogenic
7	No	SETD2	chr3:47163962:G/A	Pathogenic
		FANCA	chr16:89877345:C/A	Pathogenic
		ROS1	chr6:117641065:C/A	Likely pathogenic
8	No	AKT3	chr1:243716031:C/T	Likely pathogenic
		PIK3CA	chr3:178922364:G/T	Likely pathogenic
		TP53	chr17:7578212:G/A	Pathogenic
9	No	ARID1A	chr1:27057730:C/T	Pathogenic
		DDR2	chr1:162748421:G/A	Likely pathogenic
		PML	chr15:74327603:C/T	Likely pathogenic
10	No	BRCA2	chr13:32906996:G/T	Pathogenic
		BRCA1	chr17:41256926:A/T	Pathogenic
		RAD54L	chr1:46739030:C/T	Likely pathogenic
		DDR2	chr1:162724993:G/T	Likely pathogenic
		EGFR	chr7:55242451:C/T	Likely pathogenic
		CDKN2A	chr9:21974600:G/T	Likely pathogenic
11	No	FANCL	chr2:58456963:G/A	Pathogenic
		SPTA1	chr1:158654996:G/A	Pathogenic
		ERBB3	chr12:56487628:C/T	Pathogenic
		DICER1	chr14:95582912:G/A	Pathogenic
		TELO2	chr16:1550109:C/T	Pathogenic
		AKT2	chr19:40741190:G/A	Pathogenic
		ATRX	chrX:76814228:C/T	Pathogenic
		JAK1	chr1:65304227:C/T	Likely pathogenic
		AKT3	chr1:243716230:C/T	Likely pathogenic
		ERBB4	chr2:212295725:C/T	Likely pathogenic
		FANCD2	chr3:10106543:C/T	Likely pathogenic
		EGFR	chr7:55224304:G/A	Likely pathogenic
		EGFR	chr7:55249001:G/C	Likely pathogenic
		EGFR	chr7:55259553:G/A	Likely pathogenic
		ERBB3	chr12:56492683:G/A	Likely pathogenic
		ERCC2	chr19:45868394:T/A	Likely pathogenic
12	No	SPTA1	chr1:158596671:G/A	Pathogenic
		SDHC	chr1:161293426:C/T	Pathogenic
		CUL3	chr2:225360614:G/A	Pathogenic
		FBXW7	chr4:153247367:G/A	Pathogenic
		RICTOR	chr5:38945776:G/A	Pathogenic
		APC	chr5:112116592:C/T	Pathogenic
		SDHB	chr1:17349179:C/T	Likely pathogenic
		PIK3CA	chr3:178928113:C/T	Likely pathogenic
		ERBB3	chr12:56479001:C/T	Likely pathogenic
		CDH1	chr16:68846147:C/T	Likely pathogenic
		CDK12	chr17:37667783:C/T	Likely pathogenic
		XRCC1	chr19:44047624:G/A	Likely pathogenic
13	No	MCL1	chr1:150550914:G/A	Pathogenic
		SDHC	chr1:161293426:C/T	Pathogenic
		MDM4	chr1:204494671:C/T	Pathogenic
		ATM	chr11:108196269:C/T	Pathogenic
		TP53	chr17:7577120:C/T	Pathogenic
		PIK3CA	chr3:178952053:G/T	Likely pathogenic
		EGFR	chr7:55249050:C/T	Likely pathogenic
		EZH2	chr7:148523647:G/T	Likely pathogenic
		FGFR1	chr8:38285561:C/T	Likely pathogenic
		FLT3	chr13:28608272:C/T	Likely pathogenic
		MAP2K1	chr15:66774194:G/A	Likely pathogenic
14	No	ERBB2	chr17:37868604:C/T	Pathogenic
		ERBB4	chr2:212566734:G/T	Likely pathogenic
		ROS1	chr6:117709144:A/T	Likely pathogenic
		EGFR	chr7:55221708:G/A	Likely pathogenic
		EGFR	chr7:55238870:G/A	Likely pathogenic
		EGFR	chr7:55242422:G/T	Likely pathogenic
		FLT3	chr13:28592644:C/T	Likely pathogenic
		TP53	chr17:7577547:C/T	Likely pathogenic
15	No	BARD1	chr2:215595215:G/A	Pathogenic
		PBRM1	chr3:52696241:G/A	Pathogenic
		APC	chr5:112154942:C/T	Pathogenic
		BRAF	chr7:140494188:G/A	Pathogenic
		JAK2	chr9:5066739:C/T	Pathogenic
		KRAS	chr12:25398284:C/T	Pathogenic
		ERBB3	chr12:56489570:C/T	Pathogenic
		NF1	chr17:29562981:C/T	Pathogenic
		PIK3CA	chr3:178927430:G/A	Likely pathogenic
		ROS1	chr6:117710993:G/T	Likely pathogenic
		EGFR	chr7:55221744:C/T	Likely pathogenic
		EGFR	chr7:55223597:G/A	Likely pathogenic
		EGFR	chr7:55242488:C/T	Likely pathogenic
		EGFR	chr7:55268090:G/A	Likely pathogenic
		BRCA2	chr13:32944627:C/T	Likely pathogenic
		LIG4	chr13:108862784:C/T	Likely pathogenic
		MAP2K1	chr15:66777520:C/A	Likely pathogenic
		MAP2K1	chr15:66782858:A/G	Likely pathogenic
		TP53	chr17:7576569:G/A	Likely pathogenic
		TP53	chr17:7578475:G/A	Likely pathogenic
		XRCC1	chr19:44056248:G/A	Likely pathogenic
16	No	CUL3	chr2:225368479:G/A	Pathogenic
		PBRM1	chr3:52678727:G/A	Pathogenic
		APC	chr5:112164616:C/T	Pathogenic
		FGFR2	chr10:123247618:G/A	Pathogenic
		TP53BP1	chr15:43701889:G/A	Pathogenic
		TP53	chr17:7577538:C/T	Pathogenic
		SMARCA4	chr19:11098548:C/T	Pathogenic
		AKT3	chr1:243716097:G/A	Likely pathogenic
		XRCC1	chr19:44047624:G/A	Likely pathogenic
17	No	DPYD	chr1:98165029:A/T	Pathogenic
		BAP1	chr3:52437795:G/A	Pathogenic
		RAD50	chr5:131924420:C/T	Pathogenic
		GNAQ	chr9:80430554:G/A	Pathogenic
		NTRK2	chr9:87317327:C/T	Pathogenic
		FBXW7	chr4:153249385:G/A	Likely pathogenic
		ROS1	chr6:117684028:A/G	Likely pathogenic
		RAD54B	chr8:95392477:T/A	Likely pathogenic
		MAP2K1	chr15:66727483:G/A	Likely pathogenic
		TP53	chr17:7578427:T/G	Likely pathogenic
		ERBB2	chr17:37881332:G/A	Likely pathogenic
18	No	SDHC	chr1:161298251:C/A	Pathogenic
		RAD50	chr5:131911478:G/T	Pathogenic
		ATM	chr11:108098533:C/T	Pathogenic
		NTRK3	chr15:88727469:C/A	Pathogenic
		TP53	chr17:7578212:G/A	Pathogenic
		PPP4R1	chr18:9553396:C/A	Pathogenic
		MTOR	chr1:11184573:G/T	Likely pathogenic
		PIK3CA	chr3:178952007:A/G	Likely pathogenic
		KRAS	chr12:25380275:T/G	Likely pathogenic
19	No	APC	chr5:112151261:C/T	Pathogenic
		TP53	chr17:7578189:A/C	Likely pathogenic
20	No	ERCC6	chr10:50738783:G/A	Pathogenic
		MLH1	chr3:37090087:G/C	Likely pathogenic
		KRAS	chr12:25378562:C/T	Likely pathogenic
		AKT1	chr14:105258938:G/A	Likely pathogenic
21	No	APC	chr5:112151261:C/T	Pathogenic
		TP53	chr17:7577548:C/T	Pathogenic
		FBXW7	chr4:153247288:C/T	Likely pathogenic
		FBXW7	chr4:153249385:G/A	Likely pathogenic
		KRAS	chr12:25378562:C/T	Likely pathogenic
22	No	PIK3CA	chr3:178936091:G/A	Pathogenic
		TP53	chr17:7578406:C/T	Pathogenic
23	No	AKT1	chr14:105246551:C/T	Pathogenic
		XAB2	chr19:7684908:G/A	Pathogenic
		CSF1R	chr5:149435895:G/A	Likely pathogenic
		BRAF	chr7:140453136:A/T	Likely pathogenic
24	No	APC	chr5:112116528:T/A	Pathogenic
25	No	APC	chr5:112116592:C/T	Pathogenic
		TP53	chr17:7578492:C/T	Pathogenic
		IDH1	chr2:209108226:T/C	Likely pathogenic
26	no	N/A	N/A	N/A
